# Supplementary figures and images for: The C(3P) + O2(3Σg−) → CO2 ↔ CO(1Σ+) + O(1D)/O(3P) reaction: thermal and vibrational relaxation rates from 15 K to 20 000 K
Source: Royal Society of Chemistry journal article supplement (doi:10.1039/d1cp01101d), 2021-01-01

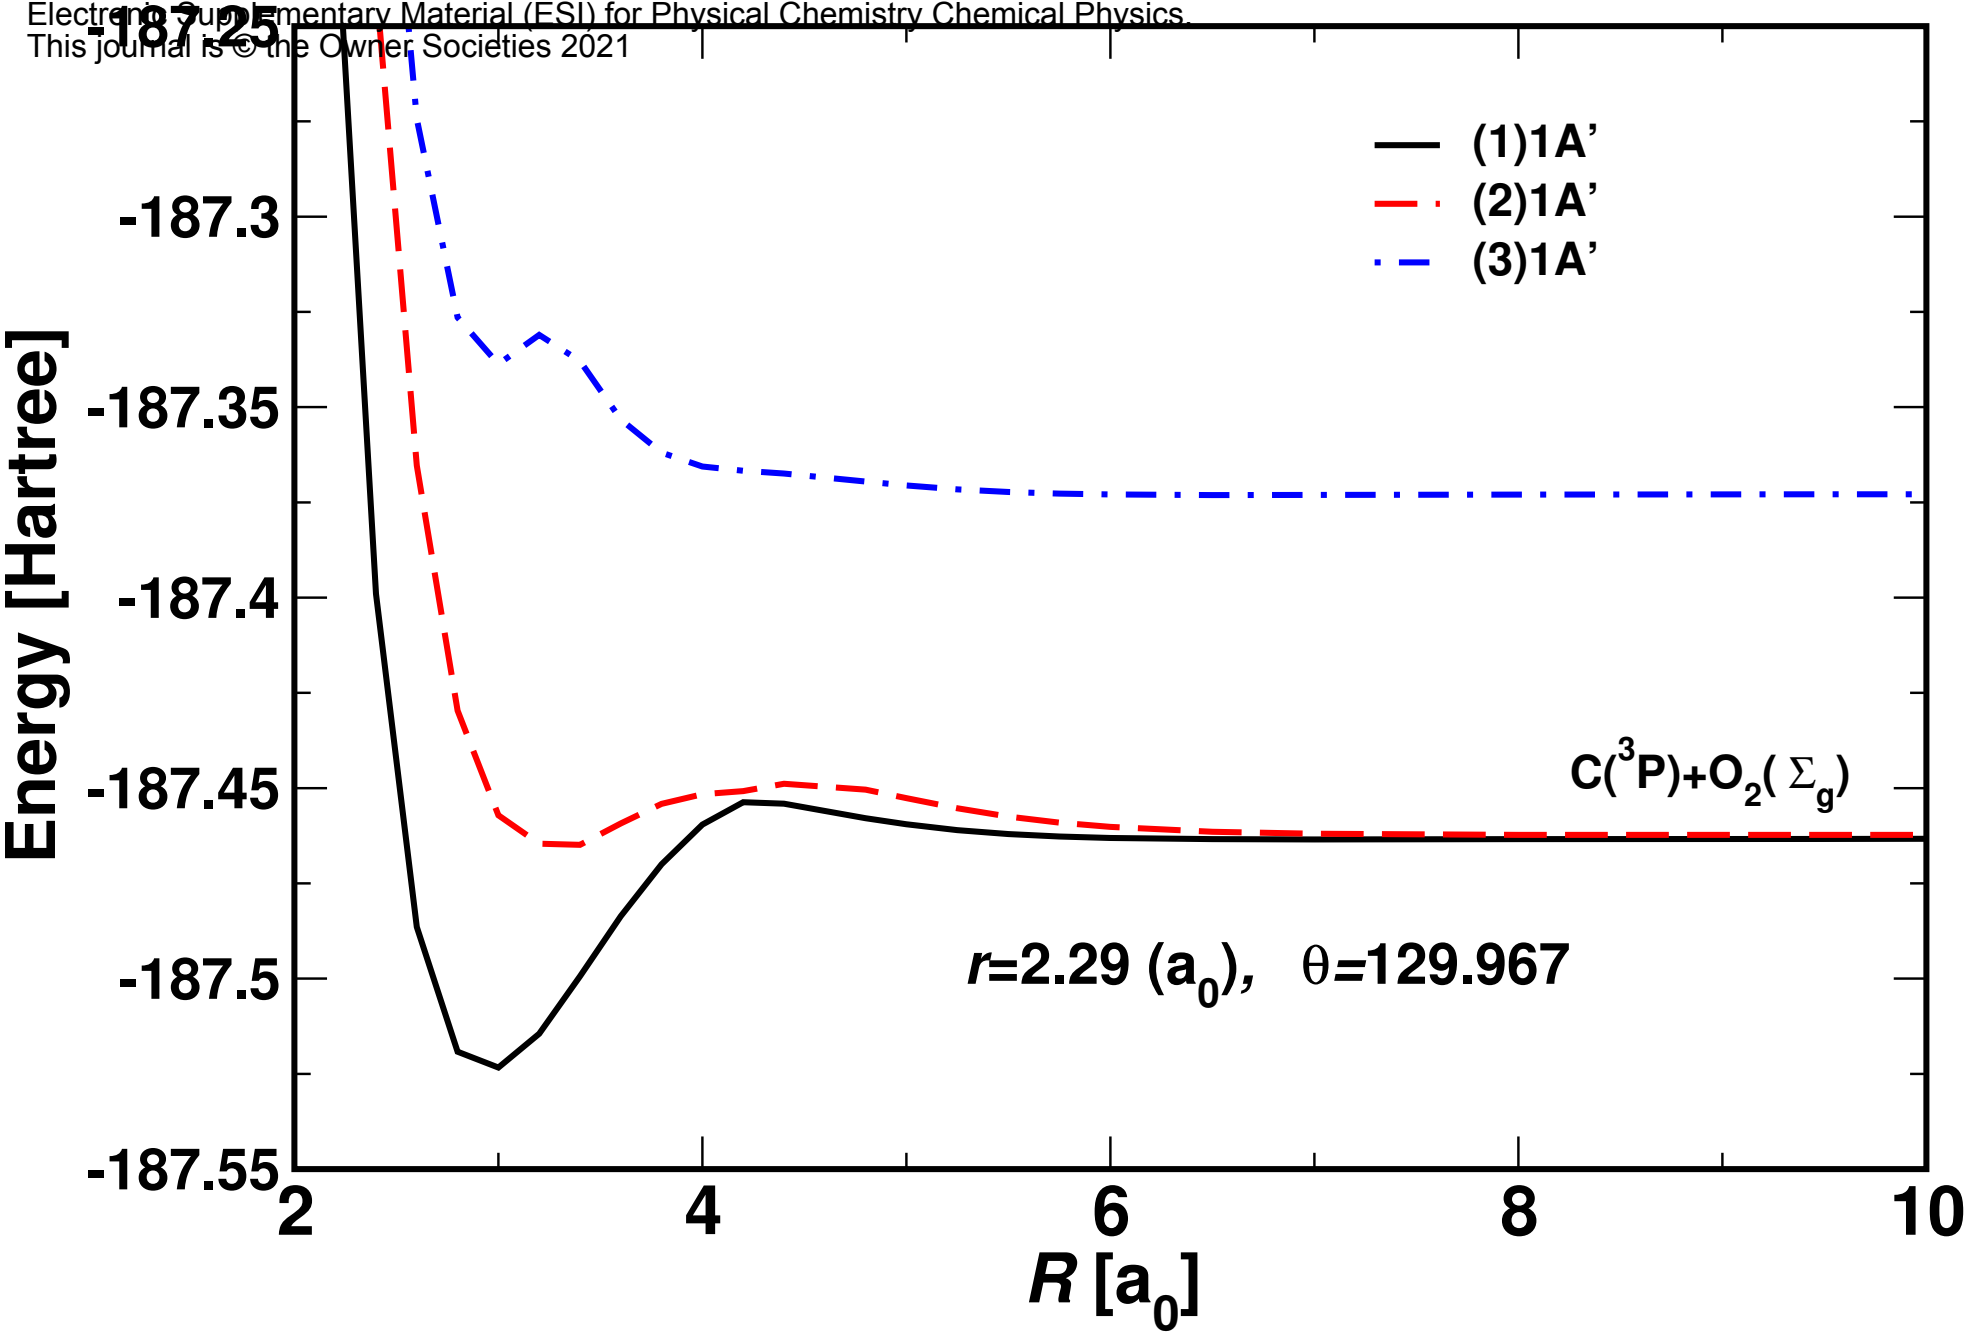

Supplement: d1cp01101d1.pdf [file d1cp01101d1.pdf]

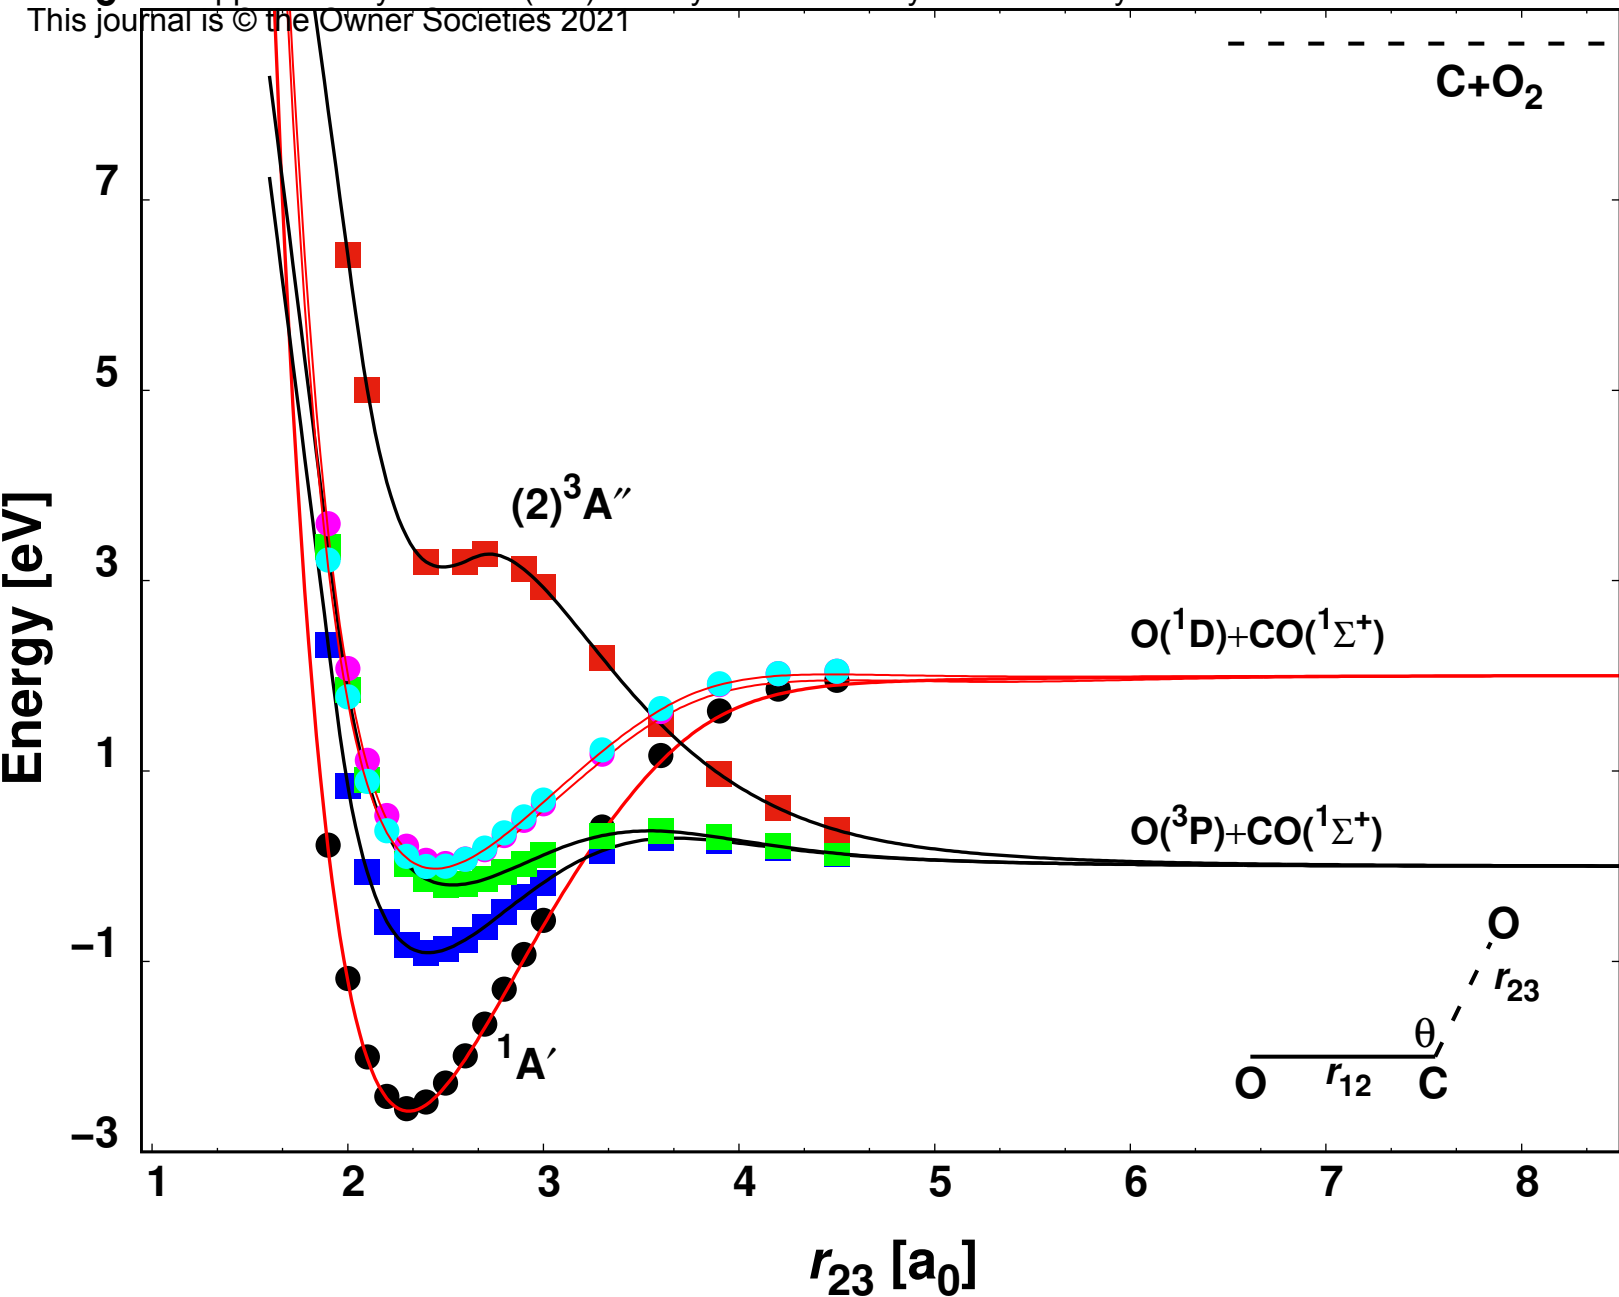

Supplement: d1cp01101d10.pdf [file d1cp01101d10.pdf]

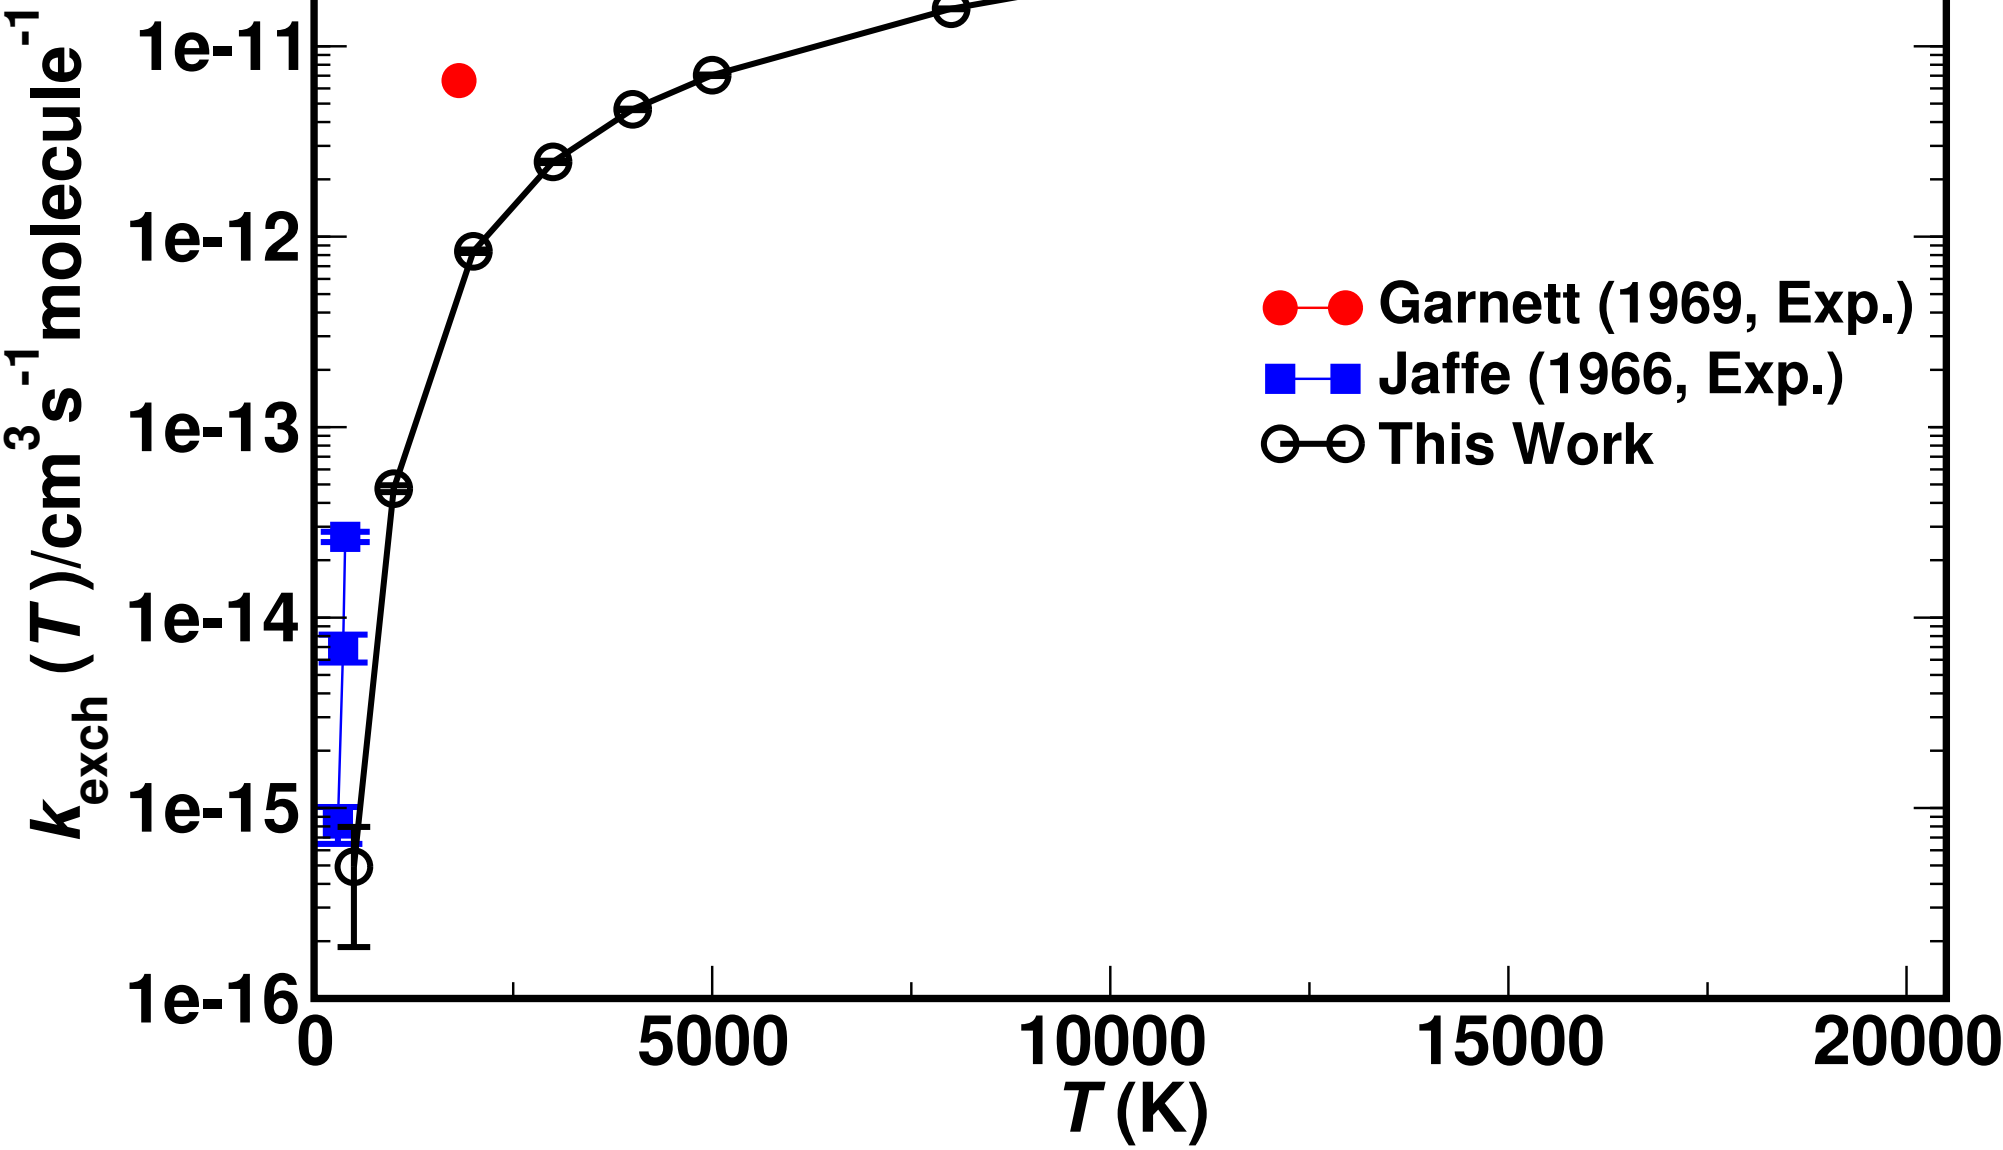

Supplement: d1cp01101d12.pdf [file d1cp01101d12.pdf]

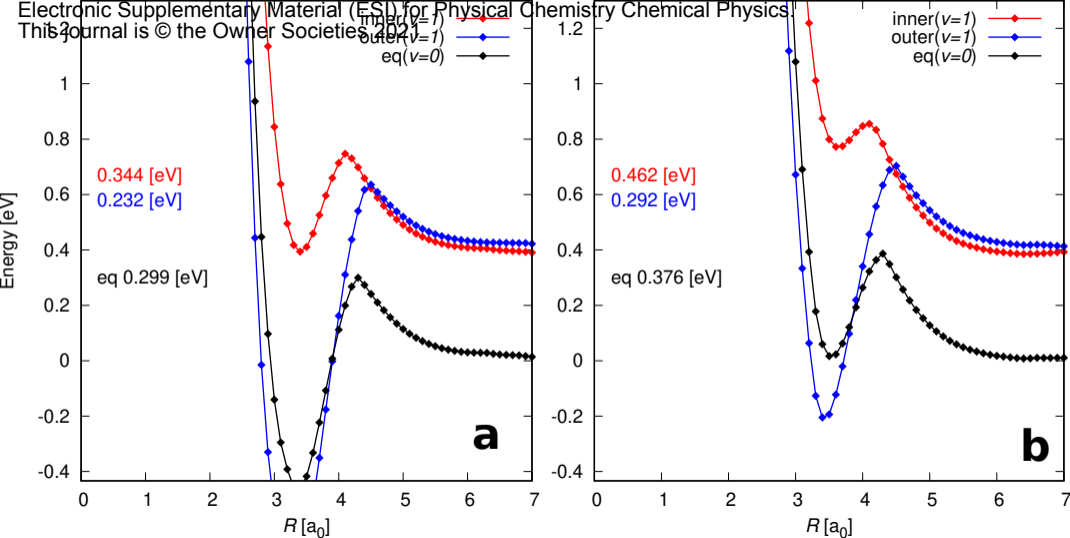

Supplement: d1cp01101d13.pdf [file d1cp01101d13.pdf]

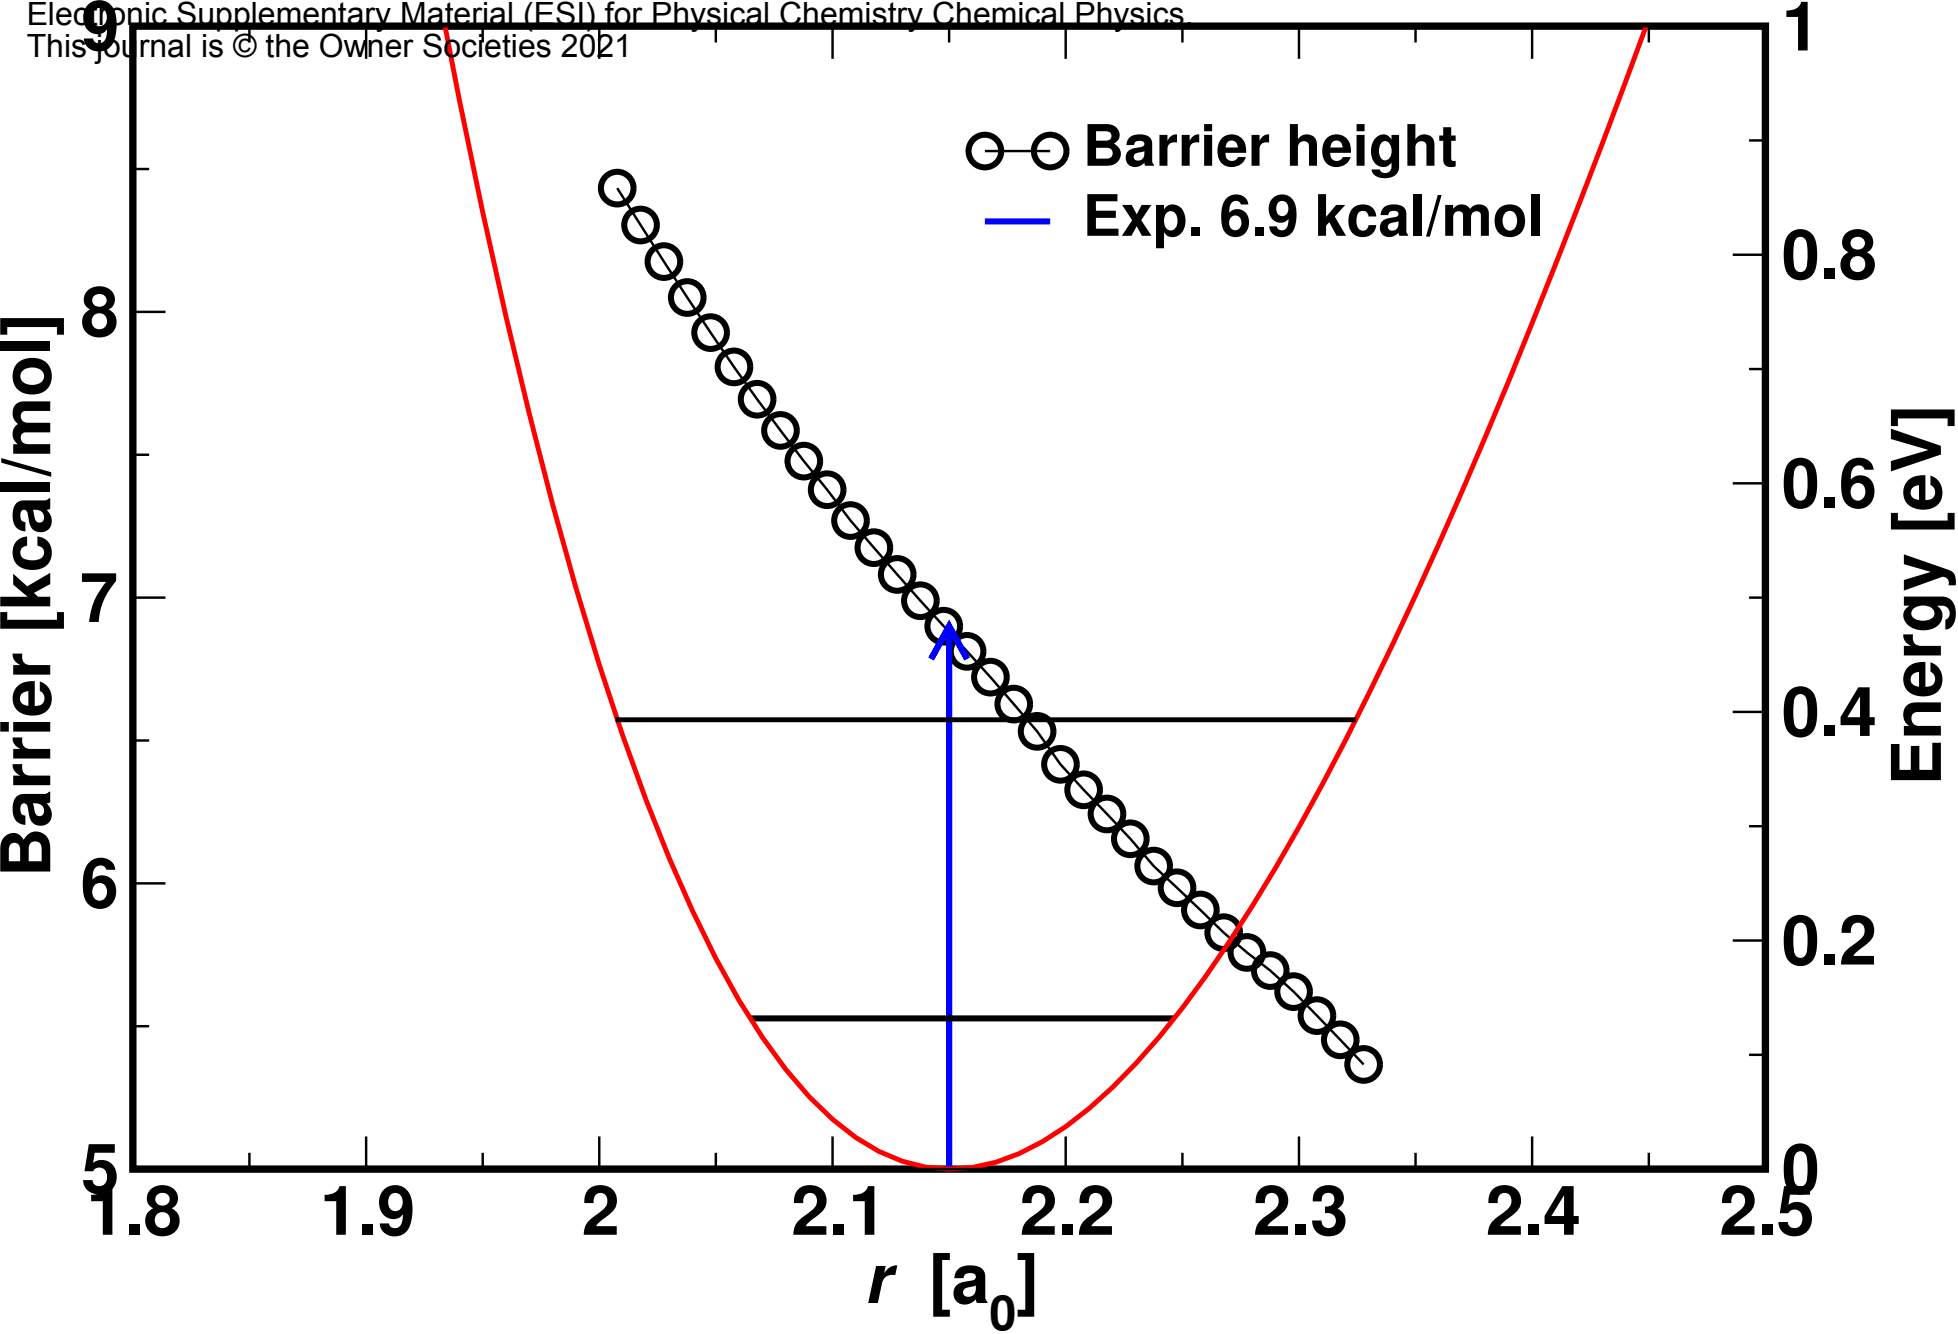

Supplement: d1cp01101d14.pdf [file d1cp01101d14.pdf]

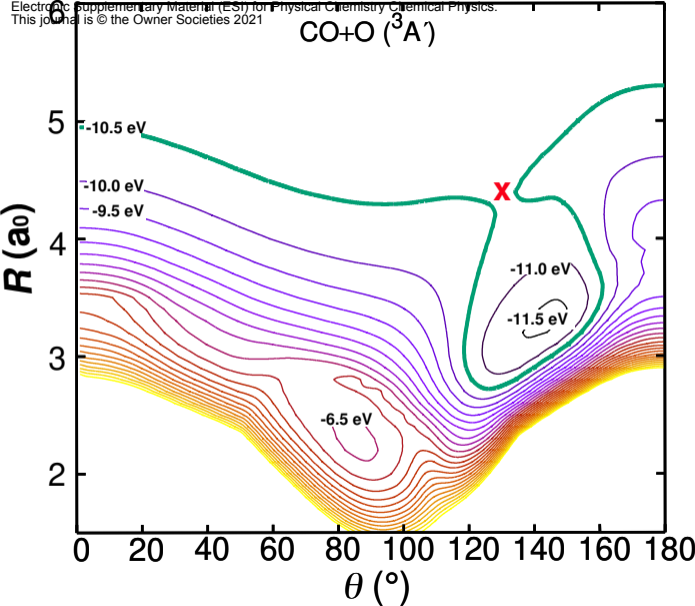

Supplement: d1cp01101d15.pdf [file d1cp01101d15.pdf]

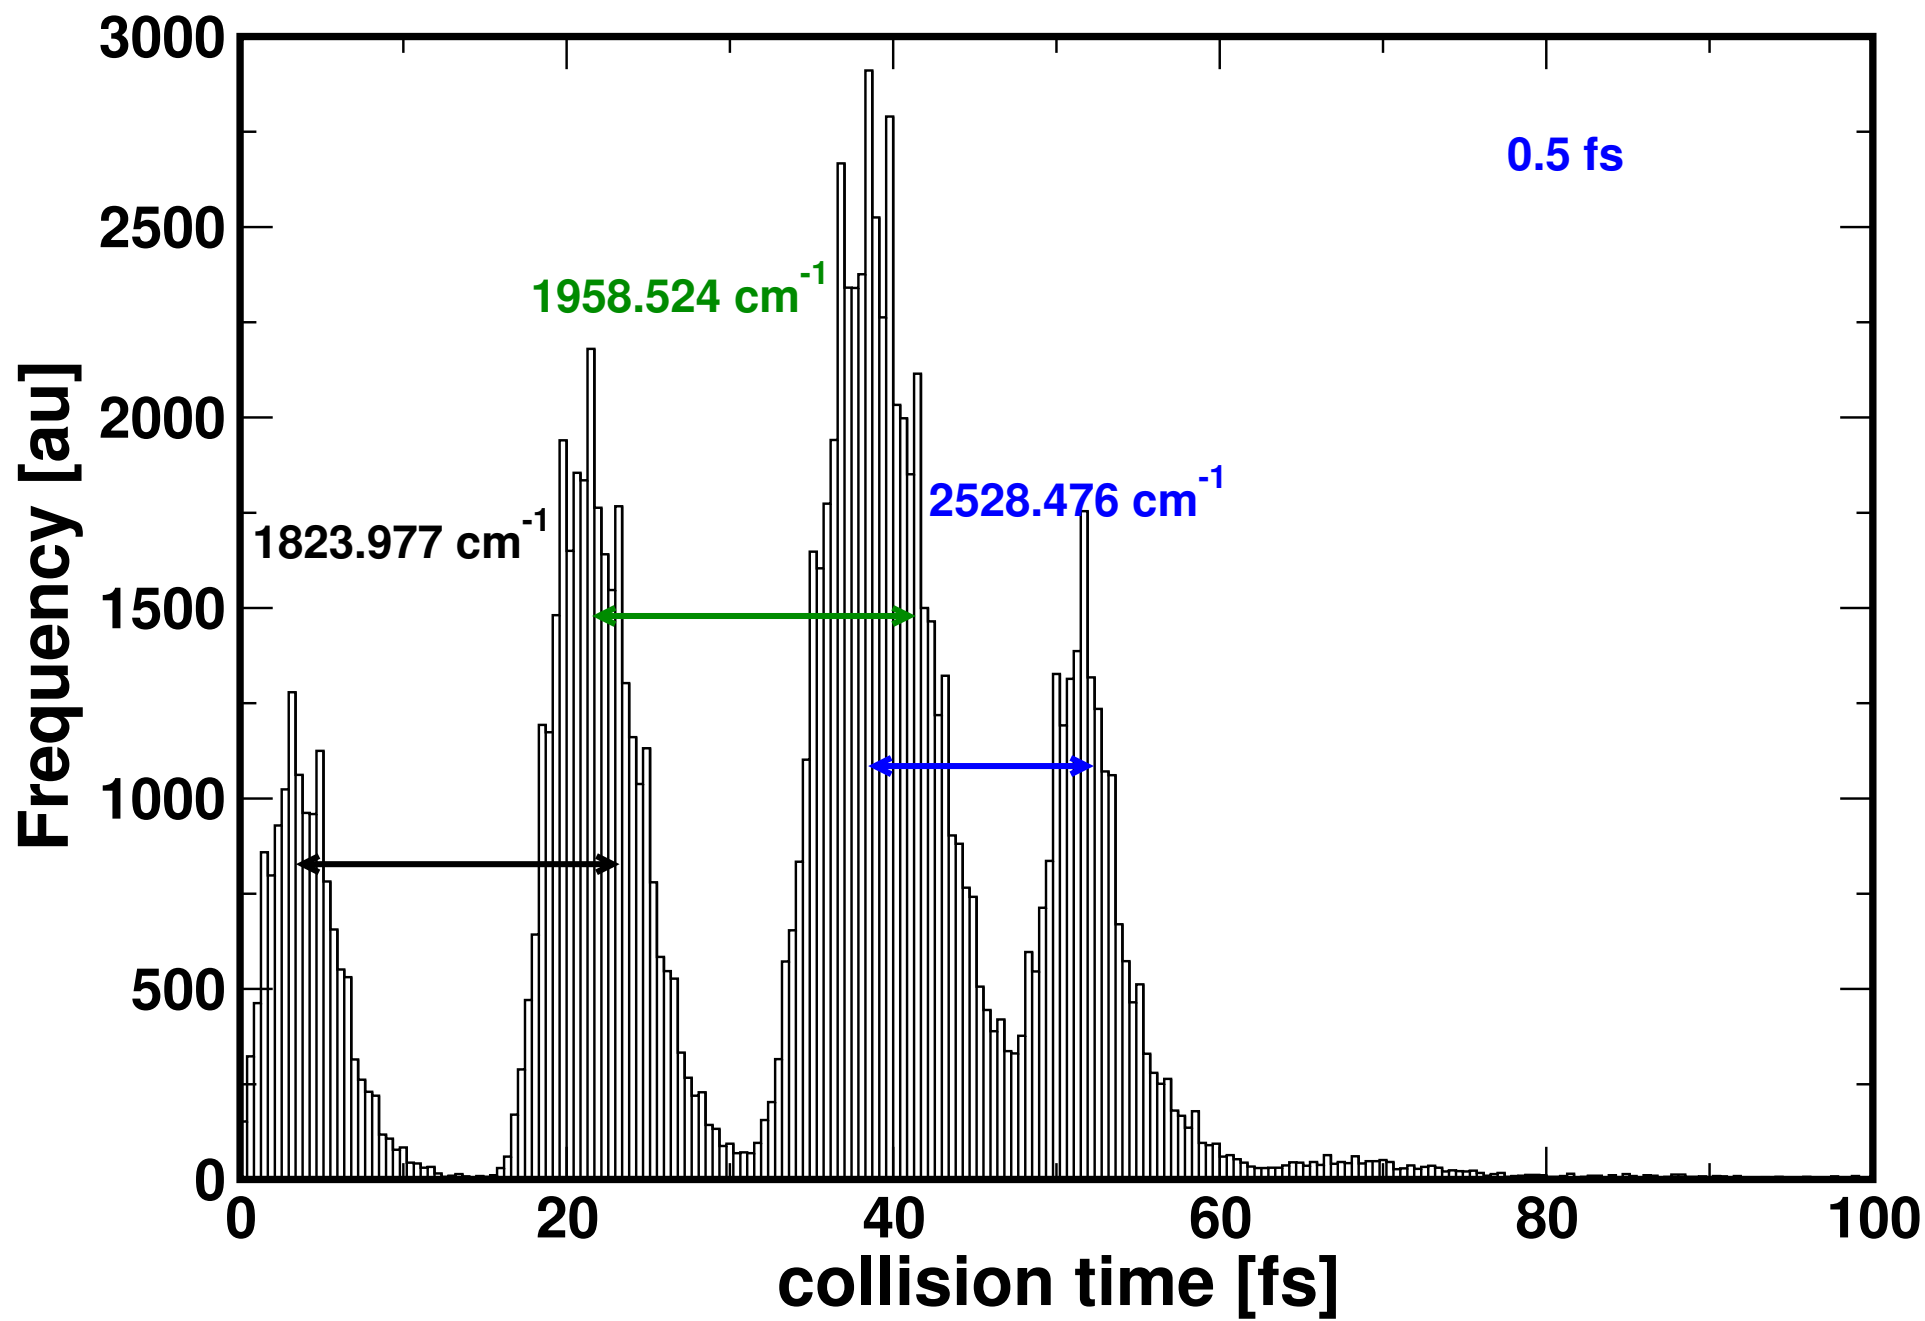

Supplement: d1cp01101d2.pdf [file d1cp01101d2.pdf]

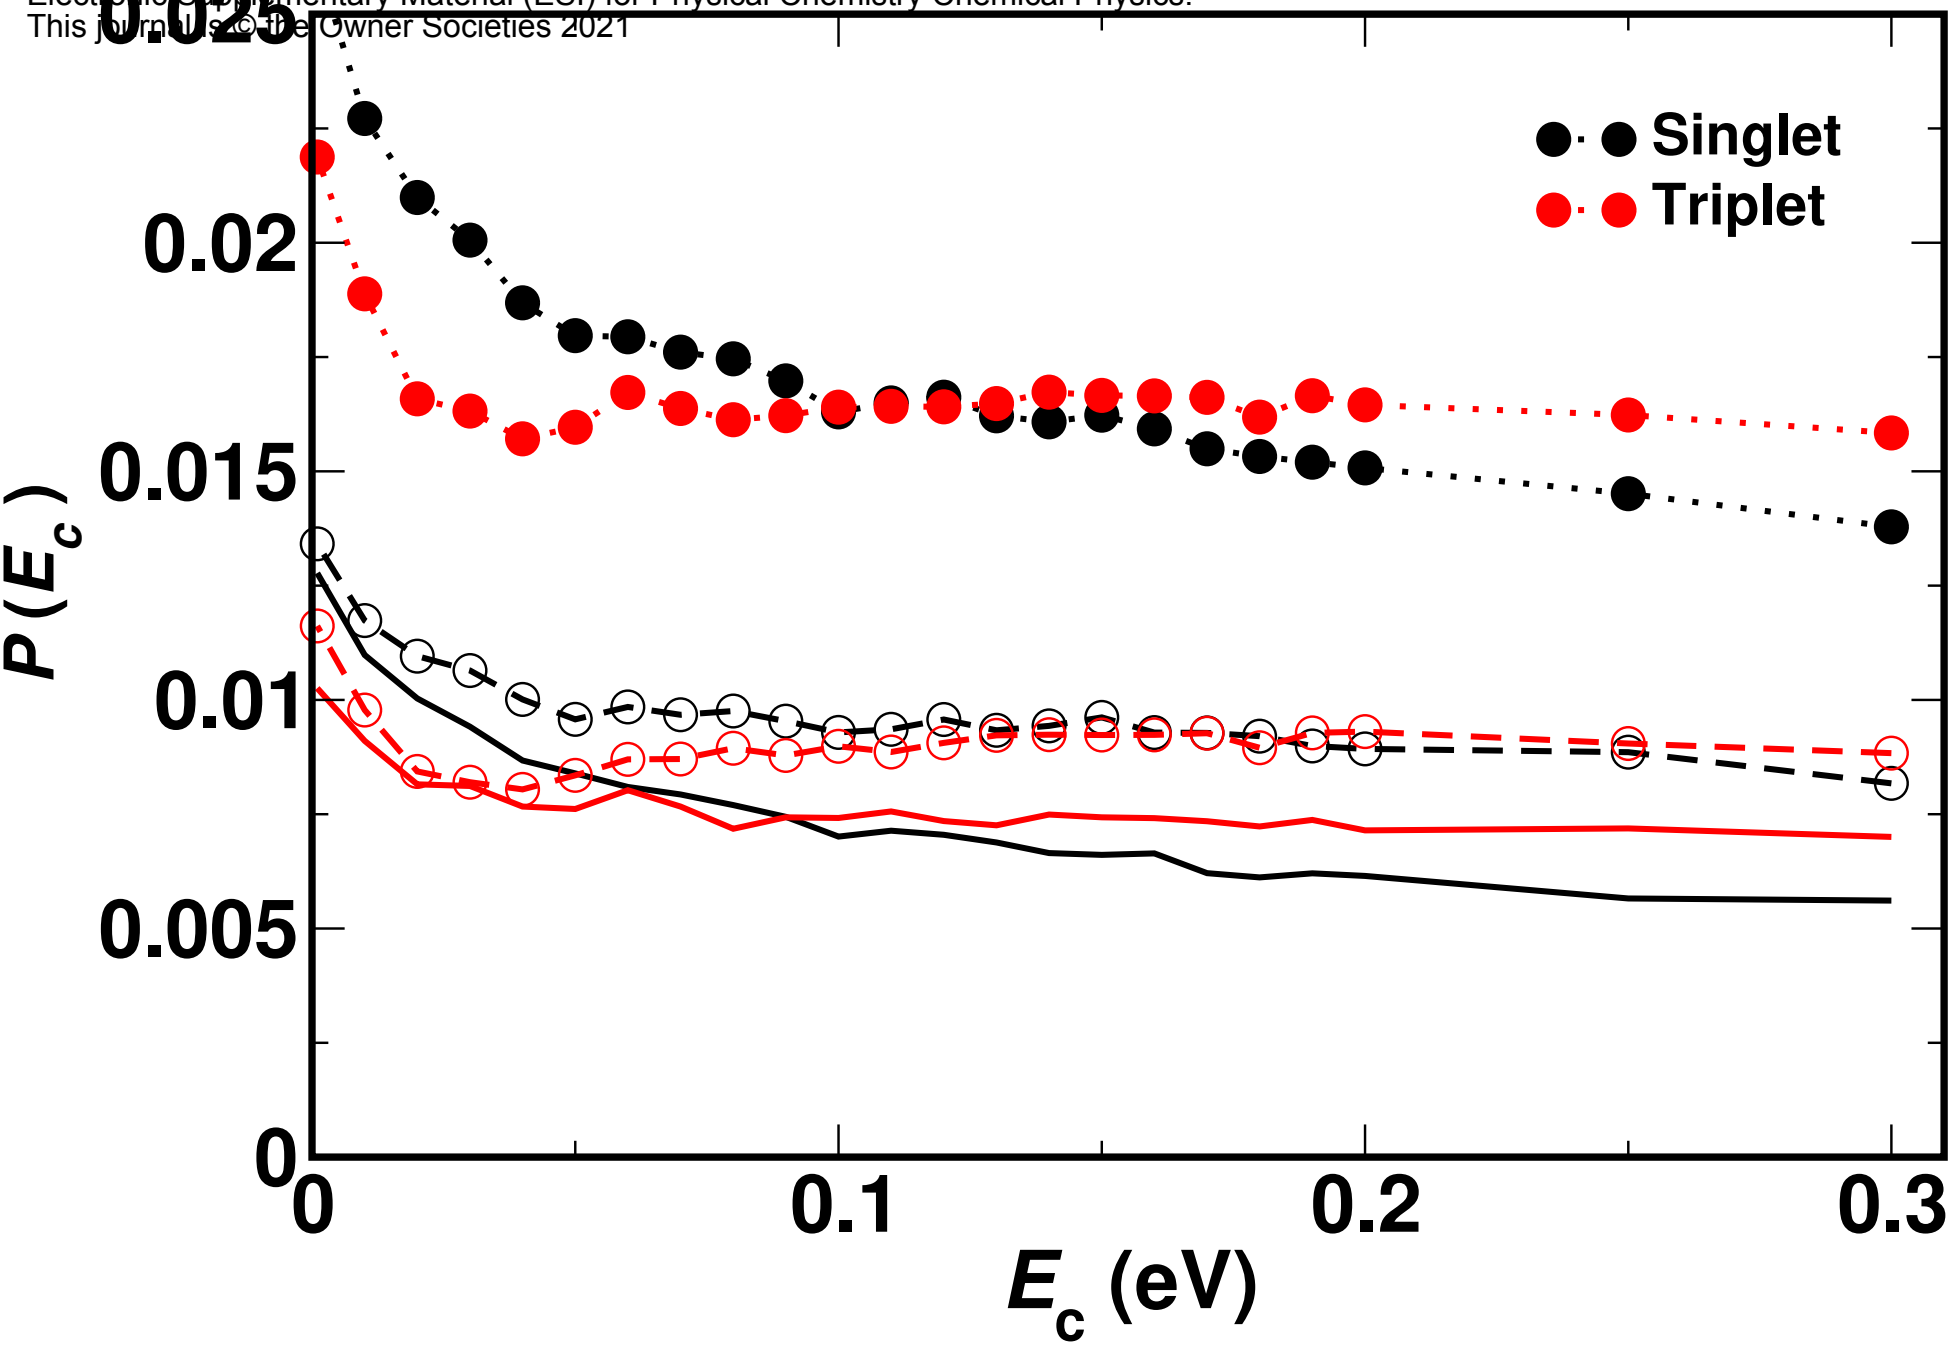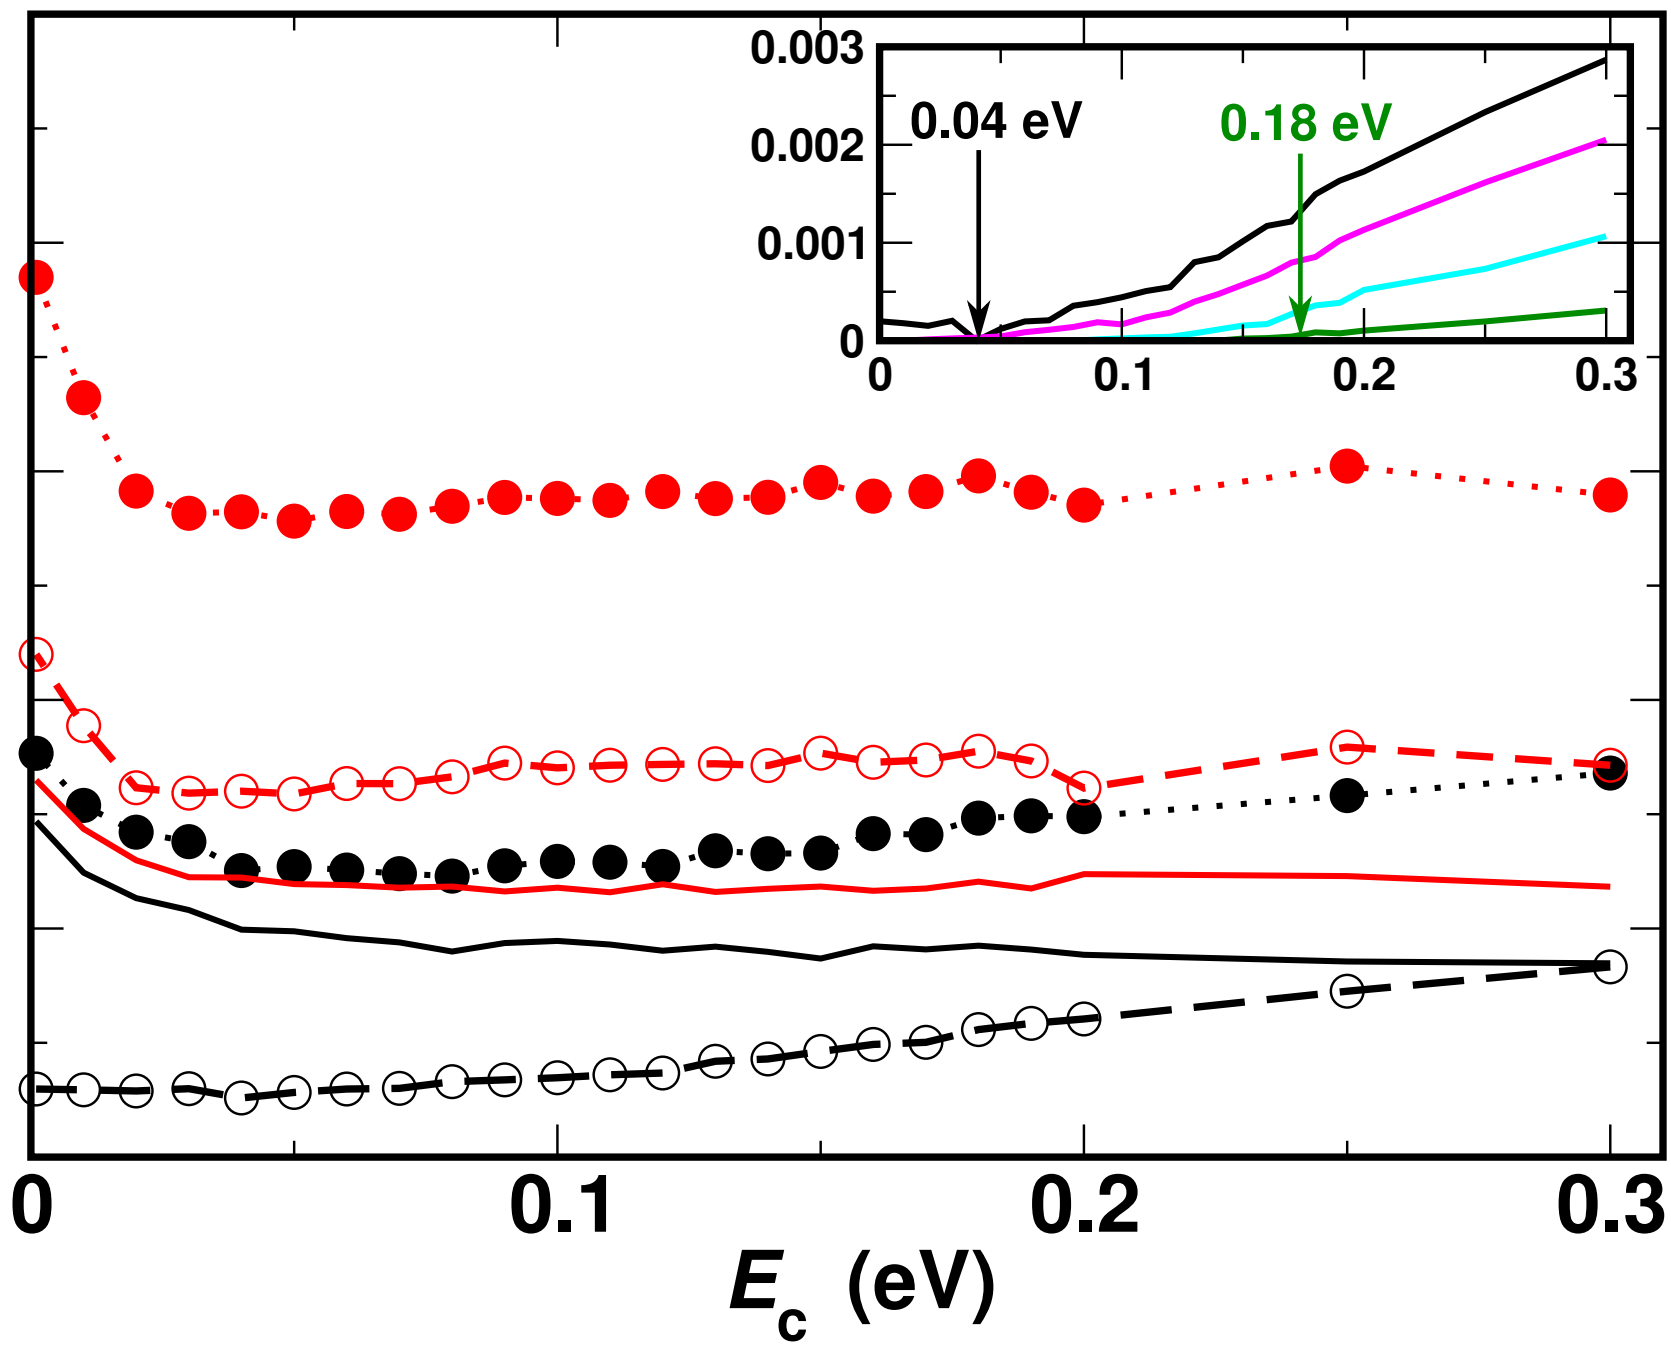

Supplement: d1cp01101d4.pdf [file d1cp01101d4.pdf]

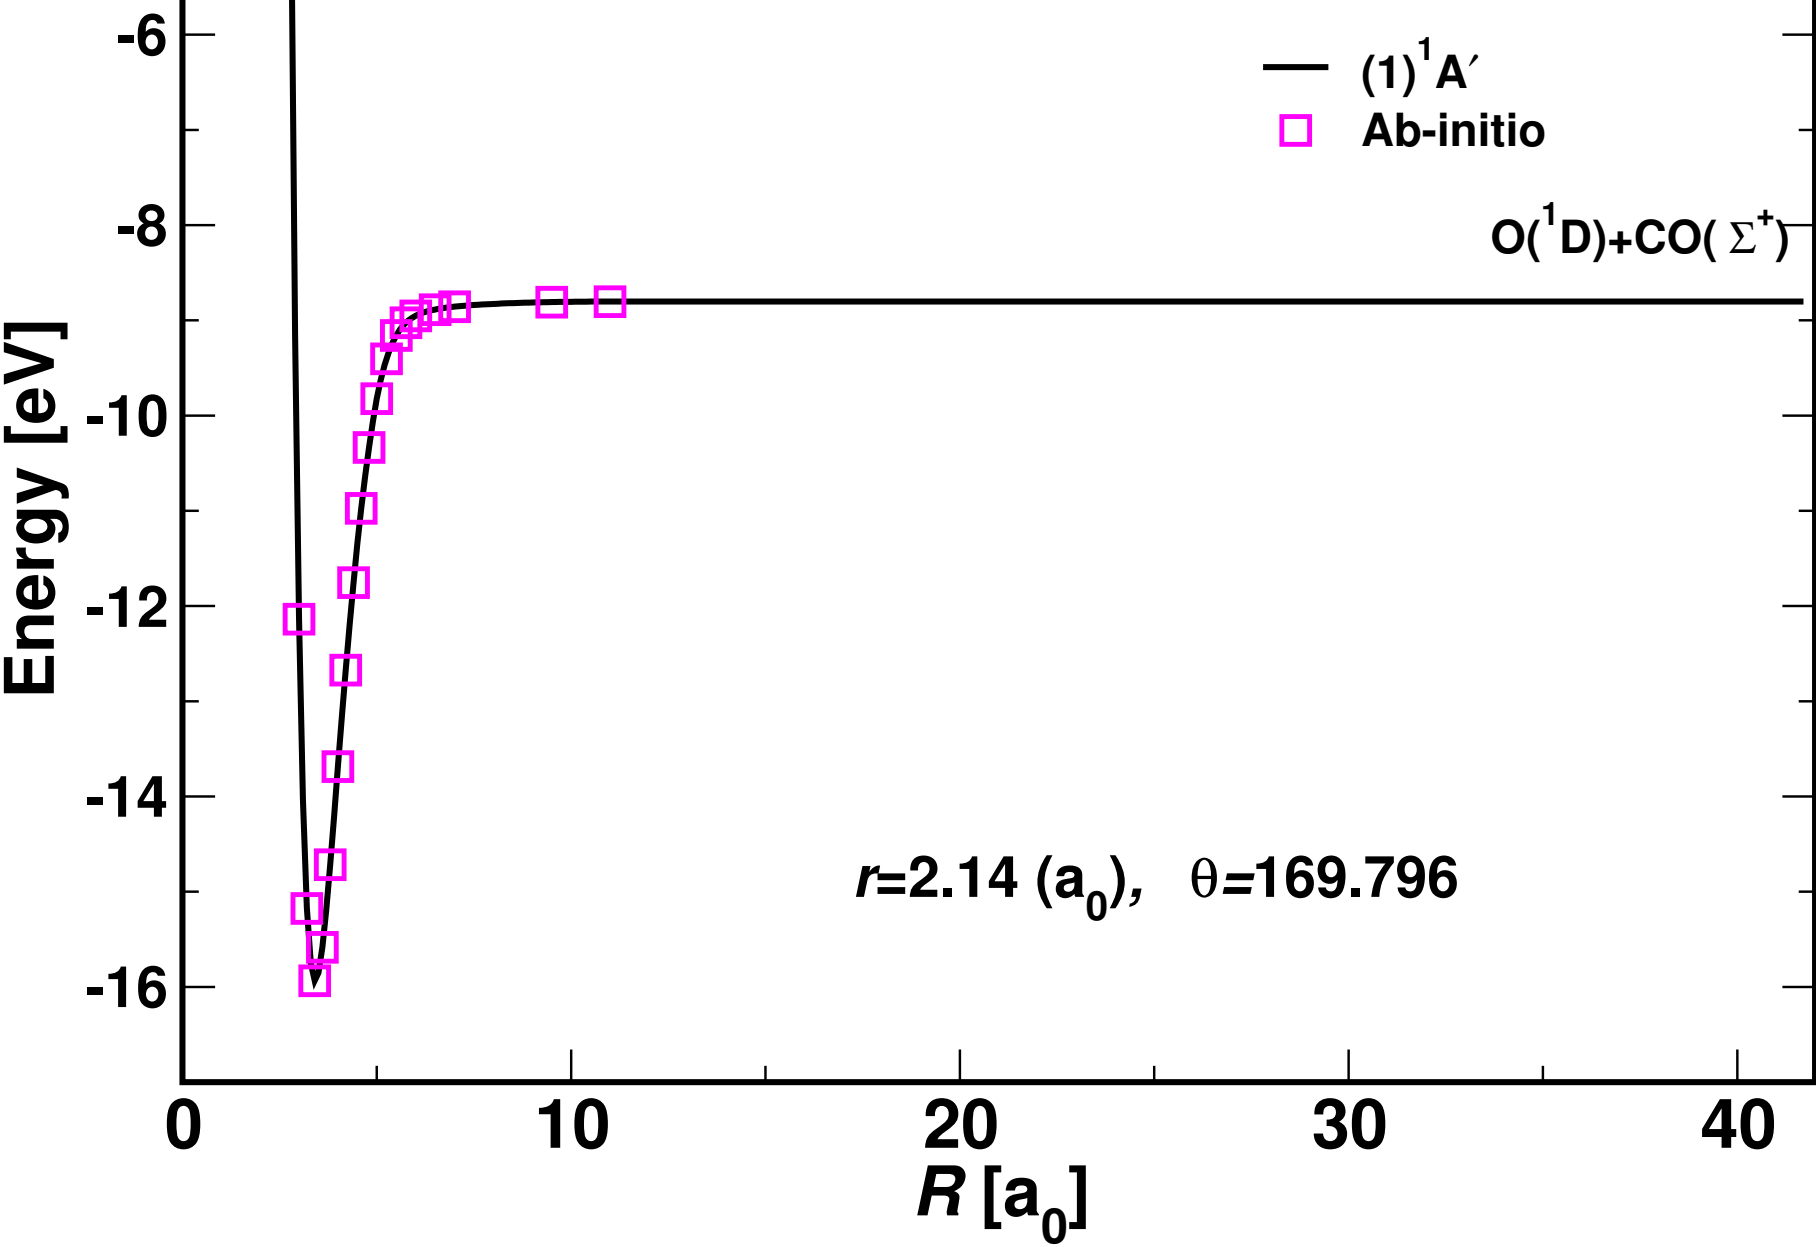

Supplement: d1cp01101d7.pdf [file d1cp01101d7.pdf]

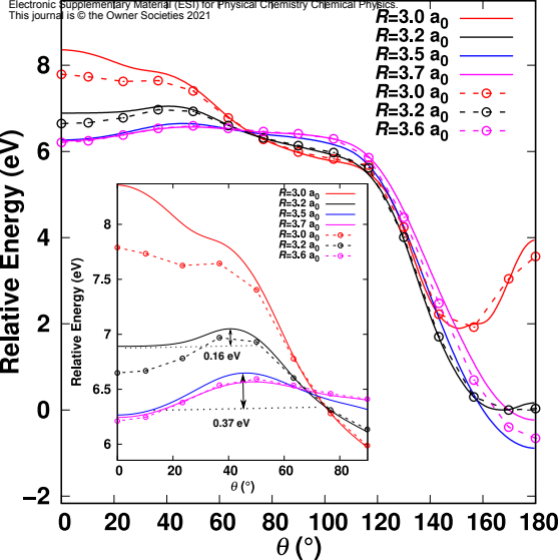

Supplement: d1cp01101d8.pdf [file d1cp01101d8.pdf]
